# Supplementary material for: Beneficial Effects of Citrus-Derived Polymethoxylated Flavones for Central Nervous System Disorders
Source: PubMed Central journal article supplement (PMC7824236; doi:10.3390/nu13010145), 2021-01-04
Supplement: nutrients-13-00145-s001.pdf [file nutrients-13-00145-s001.pdf]

**Table S1.** Neuroprotective and beneficial effect of nobiletin in several experimental models for neurological disorders.

| Experimental model           | Biological activity                                                                                                                                                                                                                                               | Dosage                                                                          | Reference |
|------------------------------|-------------------------------------------------------------------------------------------------------------------------------------------------------------------------------------------------------------------------------------------------------------------|---------------------------------------------------------------------------------|-----------|
| A $\beta$ 1-40-infused rats  | Nobiletin improved A $\beta$ 1-40-impaired working memory and reference memory assessed by 8-arm radial maze.                                                                                                                                                     | 10-50 mg/kg (i.p.) for 7 days before and after A $\beta$ 1-40 infusion          | [39]      |
| A $\beta$ 1-42-infused mice  | Nobiletin ameliorated spatial learning and memory deficits evaluated by Morris-water maze and passive avoidance task. AchE activity, Bcl-2 and Bcl-2/Bax level in the cortex and hippocampus were also improved.                                                  | 30 mg/kg (p.o.) for 4 weeks after A $\beta$ 1-42 infusion                       | [41]      |
| APP-SL7-5 Tg mice            | Nobiletin preserved fear-conditioned memory assessed by passive avoidance task and reduced both A $\beta$ 1-40 and 1-42 level in the hippocampus.                                                                                                                 | 10 mg/kg, (i.p.) from 9 months of age for 4 months.                             | [46]      |
| 3xTg-AD mice                 | Nobiletin prevented short-term memory and recognition memory evaluated by Y-maze and Morris water maze. Hippocampal A $\beta$ 1-40 and ROS level was reduced.                                                                                                     | 10-30 mg/kg (i.p.) for 3 months                                                 | [48]      |
| SAMP8 mice                   | Nobiletin improved object cognitive memory and context-dependent fear memory assessed by Nobel object recognition task. Oxidative stress markers and Tau hyper-phosphorylation were suppressed.                                                                   | 10-50 mg/kg (i.p.) for 1 month                                                  | [53]      |
| Olfactory bulbectomized mice | Nobiletin prevented memory impairments evaluated by the Y-maze, and cholinergic neurodegeneration in the hippocampus.                                                                                                                                             | 50 mg/kg (i.p.) or 50-100 mg/kg (p.o.) for 11 days from 3-day after OBX surgery | [56]      |
| MK-801-infused mice          | Nobiletin improved memory impairment, as assessed by fear conditioning and passive avoidance task, and ERK phosphorylation in the hippocampus.                                                                                                                    | 10-50 mg/kg (i.p.) for 7 days                                                   | [60]      |
| MPTP-infused mice            | Nobiletin improves motor impairment during the rotarod test and beam test, and ameliorated cognitive impairment during the passive avoidance test and Novel object recognition test. DARPP-32 and p-CaMKII expression level in the hippocampus was also improved. | 50 mg/kg (i.p.) for 2 consecutive weeks                                         | [66]      |

|                                          |                                                                                                                                                                                                                                                                                             |                                                                                  |         |
|------------------------------------------|---------------------------------------------------------------------------------------------------------------------------------------------------------------------------------------------------------------------------------------------------------------------------------------------|----------------------------------------------------------------------------------|---------|
| MPP+ -treated rats                       | Nobiletin maintained dopaminergic neurons, inhibited microglial activation and preserved the expression of GDNF in the substantia nigra.                                                                                                                                                    | 10 mg/kg (i.p.) for 2 consecutive weeks                                          | [67]    |
| Cerebral ischemia (BCCAO) model mice     | Nobiletin prevented associative and short-term memory impairment assessed by passive avoidance and Y-maze. p-CaMKII and MAP2 level, and LTP in the hippocampus were also improved.                                                                                                          | 50 mg/kg (i.p.) for 7 days before and after carotid artery occlusion             | [71]    |
| Cerebral ischemia (MCAO) model rats      | nobiletin significantly improved brain edema, neurological deficit score and infarct volume. Nobiletin regulated Akt/CREB/BDNF pathway and Bcl-2 and ameliorated BBB permeability. Nobiletin increased the Nrf2, HO-1, SOD1 and GSH, and decreased the NF- $\kappa$ B, MMP-9 and MDA.       | 10 and 25 mg/kg (i.p.) pretreatment once daily for 3 days before surgery         | [72,73] |
| Ischemia/reperfusion (t-MCAO) model mice | Nobiletin improved the motor dysfunction, suppressed cerebral edema, infarct volume and apoptosis.                                                                                                                                                                                          | 30 mg/kg (i.v.) for before and 1 h after the start of reperfusion                | [75]    |
| Ischemia/reperfusion (MCAO) model rats   | Nobiletin suppressed the neurological deficits, brain water content and apoptosis via downregulating Bax, caspase3, TNF $\alpha$ , IL6, p-p38 and MAPKAP-2. Nobiletin enhanced the neuroprotective effect of propofol through suppression of Akt/mTOR and NF- $\kappa$ B signaling cascade. | 20 mg/kg (i.p.) or 100 mg/kg (p.o.) for 9 days before and an hour prior surgery. | [76,77] |
| LPS-infused mice                         | Nobiletin attenuated the LPS-induced microglial activation and memory impairment, and suppressed inflammatory mediators, NO, TNF $\alpha$ , IL-1, and IL-6.                                                                                                                                 | 100 mg/kg (p.o.) administration for 6 weeks                                      | [80]    |
| Demyelination model mice                 | Nobiletin improved the production of oligodendrocyte lineage precursor cells.                                                                                                                                                                                                               | 50 mg/kg (i.p.) for 3weeks (2 times/week)                                        | [83]    |
| CUMS model mice                          | Nobiletin improved the immobility time in the tail suspension test and forced swimming test. Nobiletin also suppressed corticosterone level and improved hippocampal BDNF, TrkB, and synapsin I level.                                                                                      | 25, 50 and 100 mg/kg (p.o.) for 5 weeks                                          | [86]    |
| BV2 microglia culture system             | Nobiletin suppressed TNF- $\alpha$ , IL-1 $\beta$ , p-ERK, p-JNK, and p-p38MAPKs expression.                                                                                                                                                                                                | 1-50 $\mu$ M for 15 min to 24 h                                                  | [81]    |

|                                   |                                                                                                                                                                                                                               |                                 |                             |
|-----------------------------------|-------------------------------------------------------------------------------------------------------------------------------------------------------------------------------------------------------------------------------|---------------------------------|-----------------------------|
| HuH-7 and 3Y1 cells               | Nobiletin suppressed ER stress. Increases <i>DDIT3</i> , <i>TRIB</i> , and <i>ASNS</i> genes and suppressed tunicamycin-induced apoptosis, <i>CCNA2</i> , and <i>TXNIP</i> protein level.                                     | 100 $\mu$ M for 1-4 days        | [93,94]                     |
| PC12 cells                        | Nobiletin promoted neurite out-growth, activated PKA/ERK/CREB cascade and CRE-mediated transcription, upregulated NMDA receptor subunits, mAChR, ChAT, CBP and c-Fos proteins, and Inhibited A $\beta$ -induced inflammation. | 1-100 $\mu$ M for 1 min to 24 h | [98,99,100,107,111,117,120] |
| Primary cultured neurons          | Nobiletin promoted PKA/ERK/CREB signaling cascade, CRE-dependent transcriptional activity.                                                                                                                                    | 1-100 $\mu$ M for 1 min to 8 h  | [39,98,100,101,104]         |
| Hippocampal slices                | Nobiletin upregulated synaptic transmission by stimulating PKA-mediated phosphorylation of the GluR1.                                                                                                                         | 100 $\mu$ M for 10-50 min       | [104]                       |
| SK-N-SH cells                     | Nobiletin enhanced neprilysin mRNA, protein and its activity.                                                                                                                                                                 | 3-30 $\mu$ M for 24 h           | [118]                       |
| iPS cell-derived AD model neurons | Nobiletin reduced intracellular and extracellular A $\beta$ levels, and upregulated neprilysin mRNA levels.                                                                                                                   | 3-30 $\mu$ M for 24 h           | [119]                       |

A $\beta$ ; amyloid- $\beta$ , AchE; acetylcholine esterase, AD; Alzheimer's disease, APP; amyloid- $\beta$  precursor protein, BBB; blood brain barrier, BCCAO; Bilateral common carotid artery occlusion, BDNF; brain-derived neurotrophic factor, ChAT; choline acetyltransferase, CaMKII; Ca<sup>2+</sup>/calmodulin-dependent protein kinase II, CREB; cAMP response element binding protein, CBP; CREB-binding protein, CUMS; chronic unpredictable mild stress, DARPP-32; dopamine- and cAMP-regulated neuronal phosphoprotein, ER; endoplasmic reticulum, ERK; extracellular signal-regulated kinase, GDNF; glial cell line-derived neurotrophic factor, IL; interleukin, LPS; lipopolysaccharide, LTP; long-term potentiation, mAChR; muscarinic acetylcholine receptor, MAPKAP-2; MAP kinase-activated protein kinase 2, MCAO; middle cerebral artery occlusion, MPP+; 1-methyl-4-phenylpyridinium, MPTP; 1-Methyl-4-phenyl-1,2,3,6-tetrahydropyridine, mTOR; mammalian target of rapamycin, NF-kB; nuclear factor-kappa B, NMDA; N-Methyl-D-aspartate, NO; nitric oxide, OBX; olfactory bulbectomy, PKA; protein kinase A, SAMP8; senescence accelerated mouse-prone 8, t-MCAO; transient middle cerebral artery occlusion, TNF $\alpha$ ; tumor necrosis factor-alpha, TXNIP; thioredoxin-interacting protein.

**Table S2.** Beneficial effect of tangeretin in neurological disease models.

| Experimental model                                    | Biological activity                                                                                                                                                                                                                                                                    | Dosage                                                                                          | Reference |
|-------------------------------------------------------|----------------------------------------------------------------------------------------------------------------------------------------------------------------------------------------------------------------------------------------------------------------------------------------|-------------------------------------------------------------------------------------------------|-----------|
| 6-OHDA-infused rats                                   | Tangeretin attenuated the 6-OHDA-induced decline in TH-positive cells and the depletion of striatal DA levels.                                                                                                                                                                         | 20 mg/kg (p.o.) for 4 days                                                                      | [121]     |
| MPTP-infused rats                                     | Tangeretin improved the memory deficits and motor dysfunctions and inhibited dopaminergic degeneration and hippocampal neuronal loss. Tangeretin reduced COX-2, iNOS, IL-1 $\beta$ , IL-6 and IL-2 levels.                                                                             | 50, 100 or 200 mg/kg (p.o.) from 3 days prior to MPTP injection and continued for 20 days       | [122]     |
| MPTP/P-injected ATF6 $\alpha$ -/- mice                | Tangeretin enhanced the expression of UPR-target genes in both dopaminergic neurons and astrocytes, and promotes neuronal survival.                                                                                                                                                    | 10 mg/kg (p.o.) 24 h and 2 h before MPTP/P injections                                           | [125]     |
| PD model transgenic flies                             | Tangeretin improved the climbing ability, cognitive deficits and increased in DA content. Tangeretin reduced in various oxidative stress markers, e.g., MAO, TBARS, GST and protein carbonyl content.                                                                                  | 5, 10 and 20 $\mu$ M was added to the diet and the flies were allowed to feed on it for 24 days | [126,127] |
| Ischemia-reperfusion (MCAO) model rat                 | Tangeretin decreased brain water content, infarct volume, neurological score, brain edema, and Evans blue leakage. Tangeretin reduced PGE2, iNOS, COX-2, IL-1 $\beta$ , TLR-4 TNF- $\alpha$ , IFN- $\gamma$ , and IL-6, and oxidative stress markers, GSH, GPx, CAT, GR, MDA, and SOD. | 5, 10, 20 mg/kg                                                                                 | [128]     |
| Pilocarpine-infused rat model of epilepsy             | Tangeretin reduced the seizure scores and latency to first seizure. Tangeretin improved the pilocarpine-induced suppression of PI3K/Akt signaling and AIF expression. Tangeretin also improved seizure-induced elevations in the activities and expressions of MMP-2 and -9.           | 50, 100, or 200 mg/kg (p.o.) for 10 days before pilocarpine-injection                           | [131]     |
| 5/6 nephrectomized rats                               | Tangeretin improved cognitive disturbances and memory impairments via suppress TNF- $\alpha$ , NO, IL-6 and IL-1 $\beta$ , NF- $\kappa$ B/TNF- $\alpha$ /iNOS signaling pathways.                                                                                                      | 50, 100 or 200 mg/kg (i.g.) for 30 days (starting 5 days after surgery for 35 days)             | [135]     |
| Single prolonged stress (SPS)-induced PTSD model rats | Tangeretin improved cognitive impairment. Tangeretin rescued the neurochemical abnormalities and the SPS-induced decreases in DA and 5-HT levels in the hippocampus and amygdala.                                                                                                      | 100 mg/kg (i.p.) for 14-day after exposure to SPS                                               | [138]     |

|                                              |                                                                                                                                                                                                                                                                |                                                      |           |
|----------------------------------------------|----------------------------------------------------------------------------------------------------------------------------------------------------------------------------------------------------------------------------------------------------------------|------------------------------------------------------|-----------|
| HBMEC cells                                  | Tangeretin improved cell viability in response to OGD-induced injury, and increased the activity of SOD and decrease the levels of ROS and MDA, as well as regulates JNK signaling pathway.                                                                    | 2.5, 5, and 10 $\mu$ M for 24 h after OGD treatment  | [139,140] |
| Primary cultured rat microglia and BV2 cells | Tangeretin decreased LPS-induced production of NO, PGE <sub>2</sub> , TNF- $\alpha$ , IL-1 $\beta$ , IL-6, ROS, iNOS and COX-2. Tangeretin also suppressed LPS-induced NF- $\kappa$ B, HO-1, p-AMPK expression.                                                | 30, 50, 100 $\mu$ M from 1 h prior to LPS for 6-24 h | [142,143] |
| RASFs                                        | Tangeretin inhibited RASFs proliferation as well as downregulated the expression of MMP-1, MMP-3, COX-2 level and the phosphorylation of ERK, p38 and JNK. Tangeretin also suppressed IL-1-mediated NF- $\kappa$ B activation and PGE <sub>2</sub> expression. | 50, 100 $\mu$ M for 24-48 h                          | [144]     |

---

5-HT; 5-hydroxytryptamine (serotonin), 6-OHDA; 6-hydroxydopamine, AIF; apoptosis-inducing factor, AMPK; adenosine monophosphate-activated protein kinase, ATF6 $\alpha$ ; activating transcription factor 6 $\alpha$ , CAT; catalase, COX-2; cyclooxygenase-2, DA; dopamine, GPx; glutathione peroxidase, GR; glutathione reductase, GSH; Glutathione, HBMEC; human brain microvascular endothelial cells, HO-1; heme oxygenase-1, IFN- $\gamma$ ; interferon-gamma, IL; interleukin, iNOS; inducible nitric oxide synthase, iPS; induced pluripotent stem, LPS; lipopolysaccharide, MAO; monoamine oxidase, MCAO; middle cerebral artery occlusion, MDA; malondialdehyde, MMP; matrix metalloproteinase, MPTP; 1-Methyl-4-phenyl-1,2,3,6-tetrahydropyridine, MPTP/P; MPTP/probenecid, NF- $\kappa$ B; nuclear factor-kappa B, NO; nitric oxide, OGD; oxygen-glucose deprivation, PI3K; Phosphoinositide 3-kinase, PGE<sub>2</sub>; prostaglandin E<sub>2</sub>, PTSD; post-traumatic stress disorder, TLR-4; Toll-like receptor 4, TNF $\alpha$ ; tumor necrosis factor  $\alpha$ , RASFs; rheumatoid synovial fibroblasts, SOD; superoxide dismutase, TBARS; 2-thiobarbituric acid reactive substances, TH; tyrosine hydroxylase, UPR; unfolded protein response.

**Table S3.** Multiple effects of 3,3',4',5,6,7,8-heptamethoxyflavone (HMF) in neurological disease models.

| Experimental model                           | Biological activity                                                                                                                                                                                                                      | Dosage                             | Reference |
|----------------------------------------------|------------------------------------------------------------------------------------------------------------------------------------------------------------------------------------------------------------------------------------------|------------------------------------|-----------|
| Cerebral ischemia (CCAO) model mouse         | HMF improved memory impairment and neuronal death via increases in p-ERK1/2, p-CAMKII and p-CREB level, and suppresses microglial activation in the hippocampus after ischemia. HMF enhanced BDNF and Dcx expression in the hippocampus. | 25 or 50 mg/kg (s.c.) for 7days    | [147,148] |
| MK-801-infused mice                          | HMF improved MK-801-induced spatial memory impairment and locomotive hyperactivity by activating ERK signaling in the hippocampus and cortex.                                                                                            | 50 mg/kg (s.c.) for 7 days         | [149,150] |
| LPS-injected mice                            | HMF suppressed LPS-induced losses in body weight, microglial activation, IL-1 $\beta$ , TNF $\alpha$ , COX-2 expression in the hippocampus.                                                                                              | 100 mg/kg (s.c.) for 1-10 days     | [151]     |
| Corticosterone-induced depression model mice | HMF prevented corticosterone-induced reductions in BDNF level in the hippocampus. HMF ameliorates corticosterone-induced reductions in neurogenesis, as well as p-CaMKII and p-ERK level in the hippocampus.                             | 50 mg/kg (s.c.) 9, 16, or 25 days  | [153]     |
| CUMS-model mice                              | HMF ameliorated CUMS-induced depressive-like behavior through rescues reduction in BDNF, p-CaMKII, p-ERK levels and neurogenesis in the hippocampus.                                                                                     | 50 or 100 mg/kg (p.o.) for 15 days | [154]     |
| Primary cultured cortical neurons            | HMF activated ERK/CREB cascade in cultured neurons.                                                                                                                                                                                      | 1-100 $\mu$ M for 10-90 min        | [149]     |
| Primary cultured astrocytes                  | HMF decreased LPS-induced iNOS, p-p38 levels and NF-kB activation.                                                                                                                                                                       | 25-100 $\mu$ g/ml for 30 min-24 h  | [152]     |
| C6 cells                                     | HMF inhibited PDE4B and PDE4D activity, and enhanced cAMP, p-ERK and p-CREB level, and BDNF expression.                                                                                                                                  | 10 $\mu$ M for 48 h                | [155]     |

BDNF; brain-derived neurotrophic factor, CaMKII; Ca<sup>2+</sup>/calmodulin-dependent protein kinase II, CCAO; bilateral common carotid artery occlusion, COX-2; cyclooxygenase-2, CREB; cAMP response element binding protein, CUMS; chronic unpredictable mild stress, Dcx; doublecortin, ERK;

extracellular signal-regulated kinase, IL; interleukin, iNOS; inducible nitric oxide synthase, LPS; lipopolysaccharide, NF- $\kappa$ B; nuclear factor-kappa B, PDE; phosphodiesterase, TNF $\alpha$ ; tumor necrosis factor-alpha,
